# Supplementary material
Source: HighWire-hosted journal article supplement (https://bmjopen.bmj.com/content/13/11/e075088)
Supplement: inline-supplementary-material-1 [file inline-supplementary-material-1.pdf]

**Table S1. Characteristics of average demographic data, meteorological conditions, socioeconomic factors, medical resources and the HR of RA patients among 122 districts and counties in Hunan in 2019**

| Variables                                    | Percentile |          |          |          |            |
|----------------------------------------------|------------|----------|----------|----------|------------|
|                                              | $X_{\min}$ | $P_{25}$ | $P_{50}$ | $P_{75}$ | $X_{\max}$ |
| <b>Population</b> (10,000 people)            | 6.21       | 34.60    | 57.06    | 81.07    | 135.13     |
| <b>Sex portion</b> (F/M)                     | 0.82       | 0.92     | 0.94     | 0.96     | 1.08       |
| <b>Age</b> (years)                           | 40         | 45       | 52       | 60       | 63         |
| <b>Temperature</b> (°C)                      | 14.44      | 16.49    | 19.17    | 23.20    | 28.16      |
| <b>Air pressure</b> (Kpa)                    | 918.63     | 982.28   | 990.19   | 997.53   | 1009.49    |
| <b>Temperature range</b> (°C)                | 6.43       | 7.40     | 7.67     | 7.94     | 8.66       |
| <b>Rain fall</b> (mm)                        | 1578.63    | 1596.27  | 1598.92  | 1606.81  | 1874.64    |
| <b>GDP</b> (100 million yuan)                | 31.18      | 117.59   | 234.72   | 364.87   | 2075.77    |
| <b>PGDP</b> (10,000 yuan)                    | 1.93       | 2.90     | 4.42     | 6.72     | 22.11      |
| <b>Doctors</b> (per 10,000 people)           | 11.30      | 19.31    | 22.47    | 29.36    | 68.75      |
| <b>Beds</b> (per 10,000 people)              | 21.15      | 50.75    | 58.69    | 78.39    | 198.71     |
| <b>Hospitals</b> (per 10,000 people)         | 1.95       | 6.70     | 8.53     | 10.09    | 15.82      |
| <b>HR of RA patients</b> (per 10,000 people) | .01        | .88      | 1.65     | 2.75     | 26.57      |

F: female; M: male; GDP: Gross Domestic Product; PGDP: GDP per capita; HR: Hospitalization rates

**Table S2. Different cluster patterns of the HR of RA patients in Hunan in 2019**

| District/county                               | Local Moran's $I$      | Z Score | $P$  | Patterns |
|-----------------------------------------------|------------------------|---------|------|----------|
| Ningxiang county <sup>a</sup>                 | $4.46 \times 10^{-6}$  | 2.16    | 0.04 | HH       |
| Shuangfeng county <sup>b</sup>                | $1.51 \times 10^{-3}$  | 2.85    | 0.02 | HH       |
| Chaling county <sup>c</sup>                   | $1.86 \times 10^{-5}$  | 0.88    | 0.04 | LL       |
| Yanling county <sup>c</sup>                   | $1.99 \times 10^{-5}$  | 0.87    | 0.04 | LL       |
| Zhuhui district <sup>d</sup>                  | $8.80 \times 10^{-5}$  | 0.99    | 0.03 | LL       |
| Yanfeng district <sup>d</sup>                 | $5.59 \times 10^{-5}$  | 1.17    | 0.00 | LL       |
| Shigu district <sup>d</sup>                   | $1.04 \times 10^{-4}$  | 1.10    | 0.02 | LL       |
| Zhengxiang district <sup>d</sup>              | $1.07 \times 10^{-4}$  | 1.00    | 0.02 | LL       |
| Hengnan county <sup>d</sup>                   | $5.51 \times 10^{-5}$  | 0.98    | 0.03 | LL       |
| Hengdong county <sup>d</sup>                  | $3.21 \times 10^{-5}$  | 1.19    | 0.02 | LL       |
| Sangzhi county <sup>e</sup>                   | $1.52 \times 10^{-5}$  | 0.85    | 0.00 | LL       |
| Guidong county <sup>f</sup>                   | $1.04 \times 10^{-5}$  | 0.87    | 0.05 | LL       |
| Jianghua county (Yao Autonomous) <sup>g</sup> | $2.98 \times 10^{-6}$  | 0.69    | 0.03 | LL       |
| Ningyuan county <sup>g</sup>                  | $-1.53 \times 10^{-4}$ | -1.15   | 0.04 | HL       |
| Shaoshan city <sup>h</sup>                    | $-1.36 \times 10^{-4}$ | -3.01   | 0.01 | LH       |
| Dongkou county <sup>i</sup>                   | $-3.22 \times 10^{-5}$ | -3.01   | 0.03 | LH       |
| Louxing district <sup>b</sup>                 | $-6.75 \times 10^{-5}$ | -3.55   | 0.02 | LH       |
| Xinning county <sup>i</sup>                   | $-2.50 \times 10^{-5}$ | -1.51   | 0.05 | LH       |
| Zhongfang county <sup>j</sup>                 | $-3.36 \times 10^{-5}$ | -2.17   | 0.05 | LH       |

HR: Hospitalization rates; HH: high-high pattern; LL: low-low pattern; HL: high-low pattern; LH: low-high pattern; a: belongs to Changsha city; b: belongs to Loudi city; c: belongs to Zhuzhou city; d: belongs to Hengyang city; e: belongs to Zhangjiajie city; f: belongs to Chenzhou city; g: belongs to Yongzhou city; h: belongs to Xiangtan city; i: belongs to Shaoyang city; j: belongs to Huaihua city.
